# Supplementary material
Source: PubMed Central journal article supplement (PMC10259476)

**CD3****CD68**

isotype

**DAPI****IFNG**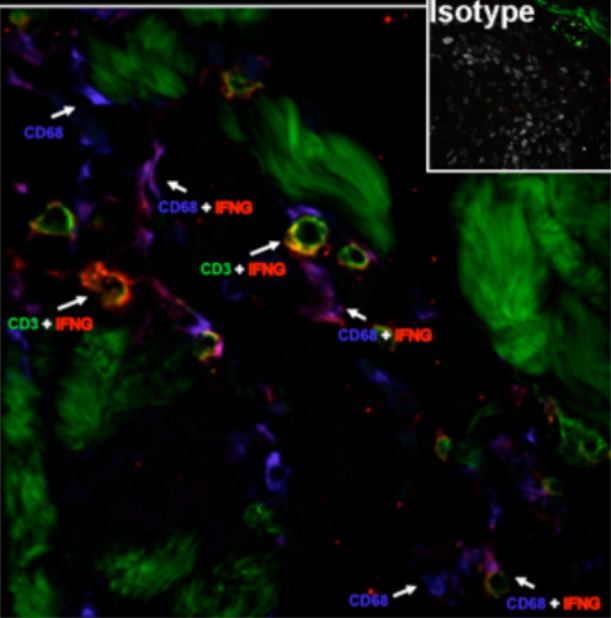

Supplement: NIHMS1873545-supplement-Figure_S1.pdf [file NIHMS1873545-supplement-Figure_S1.pdf]

**a**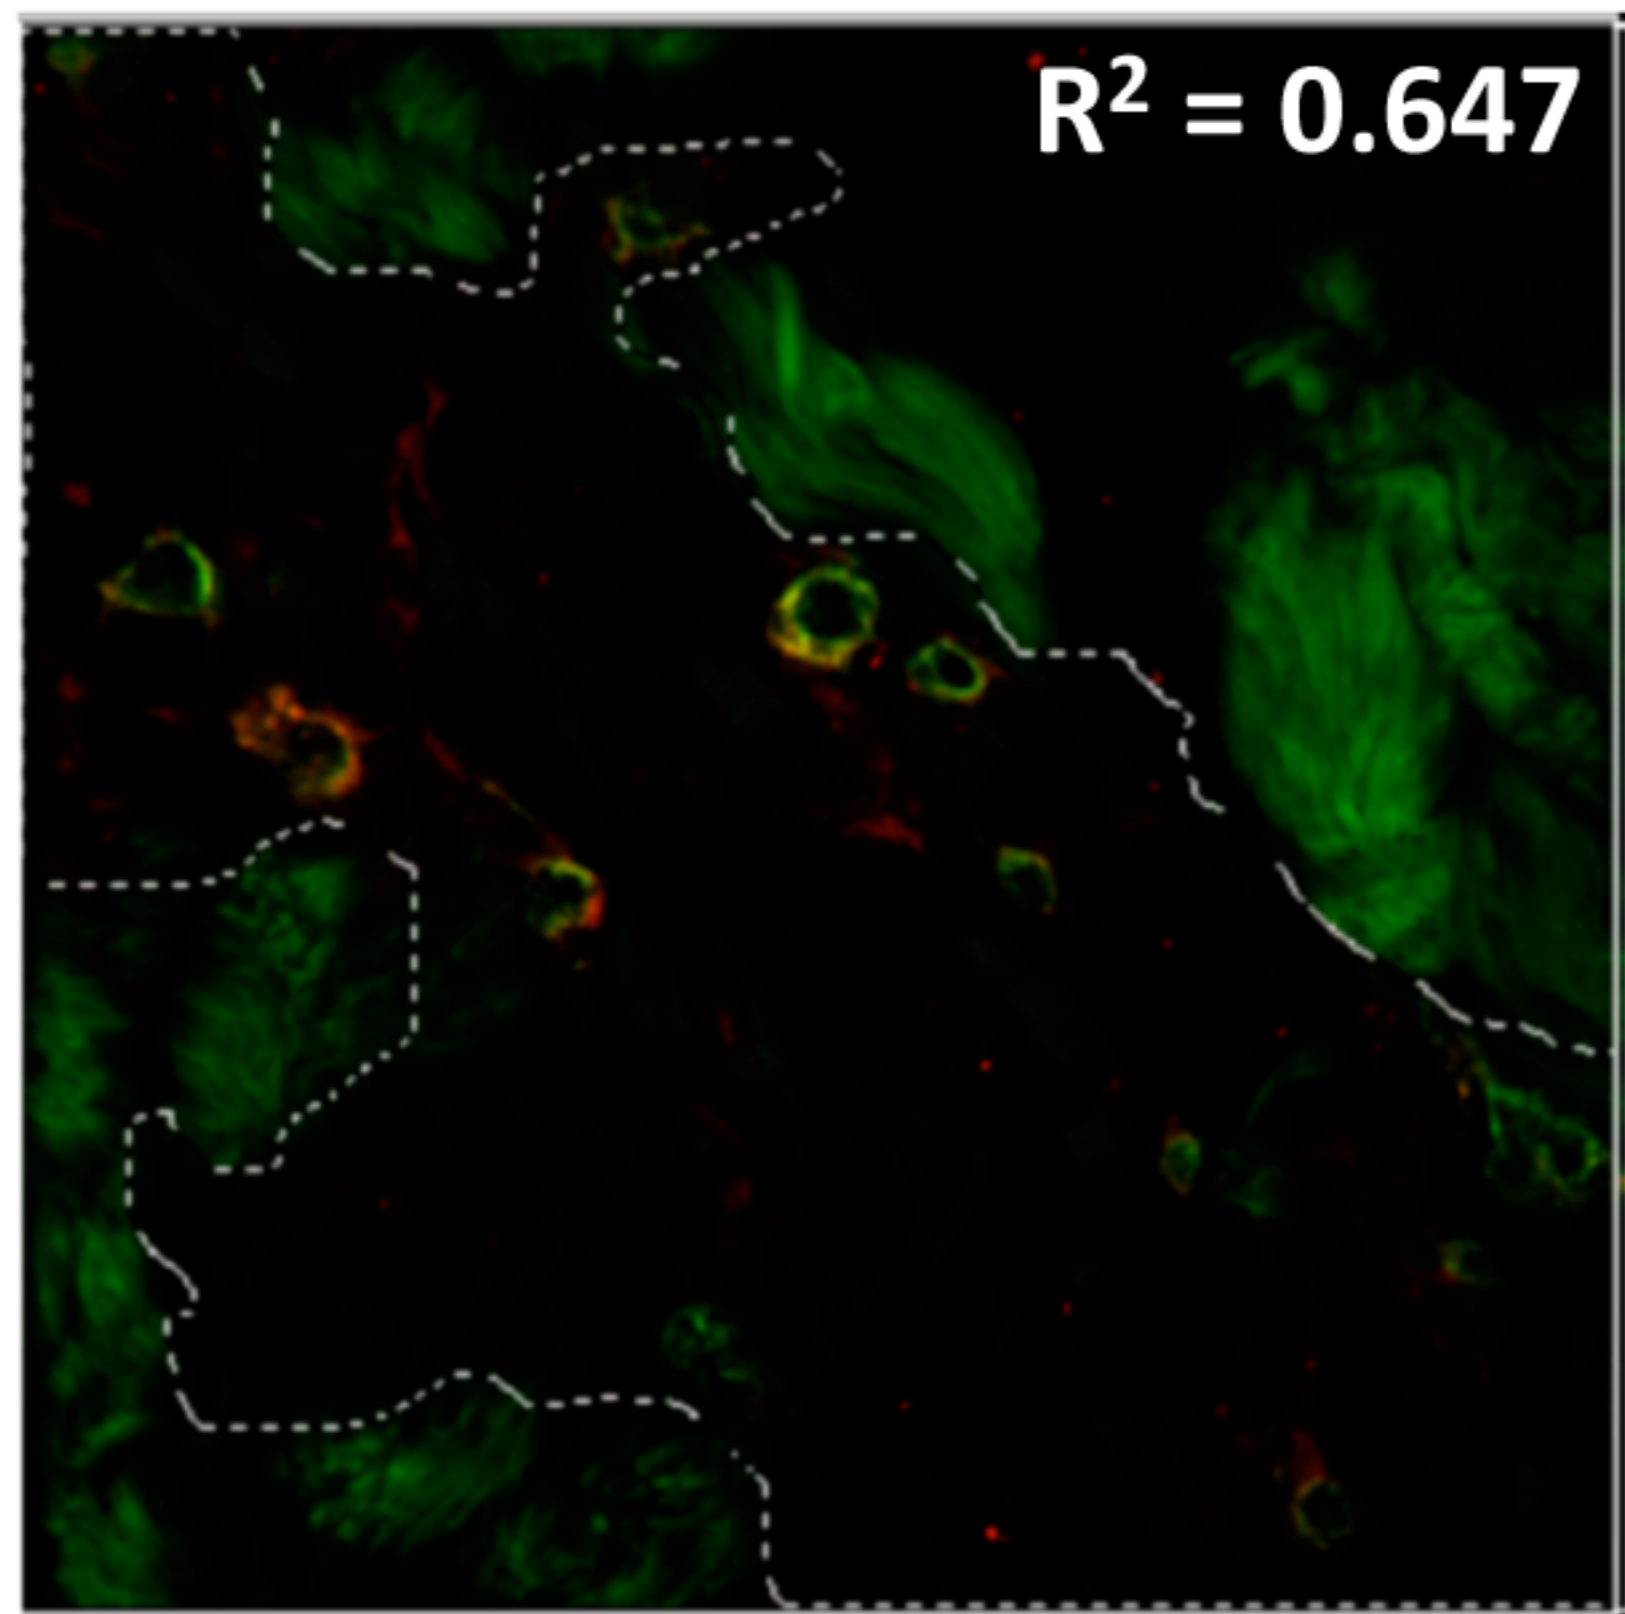**b**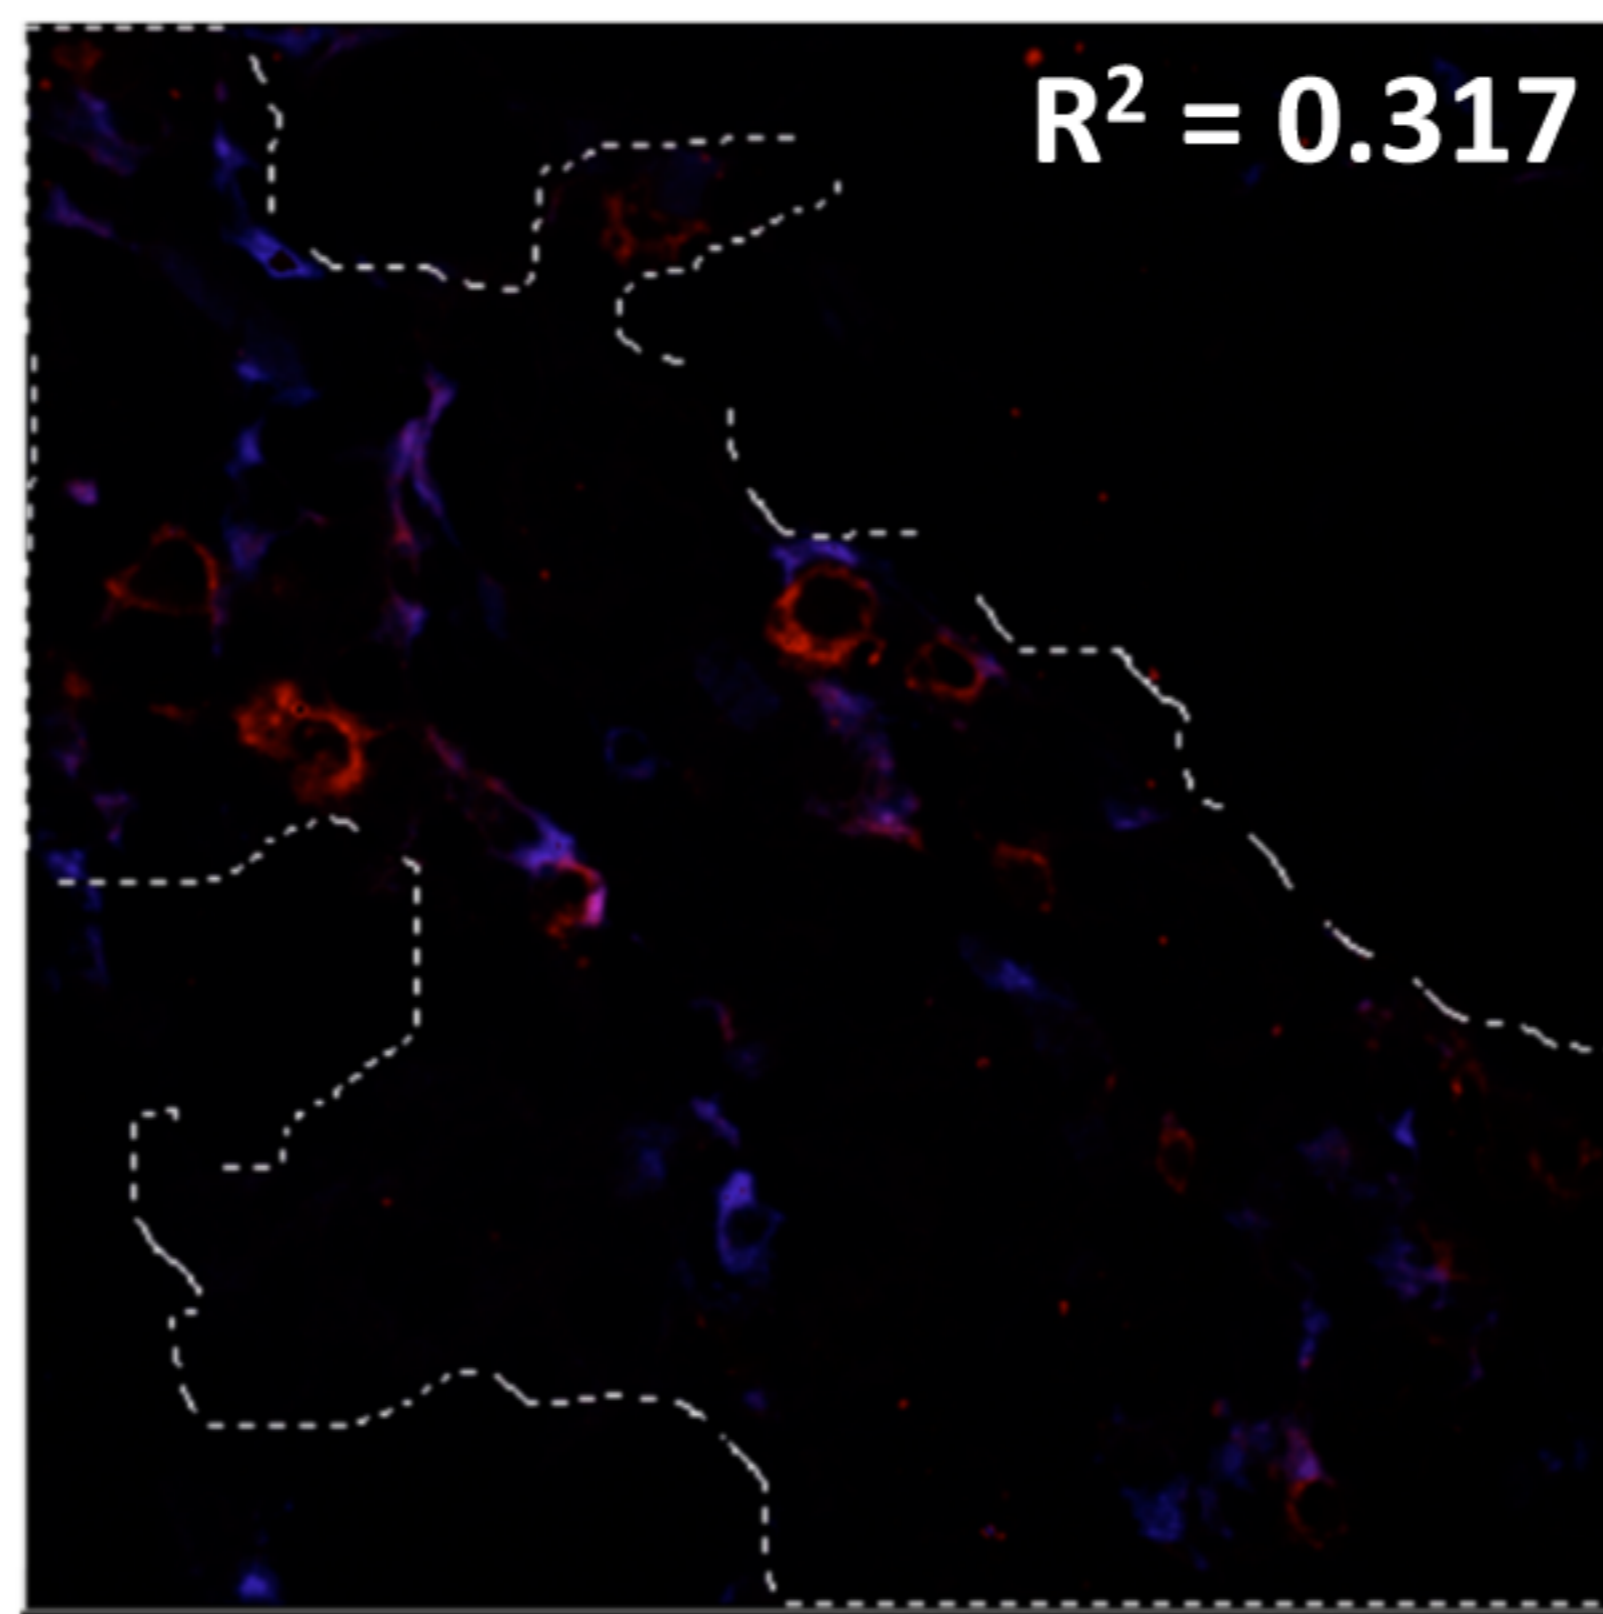**c**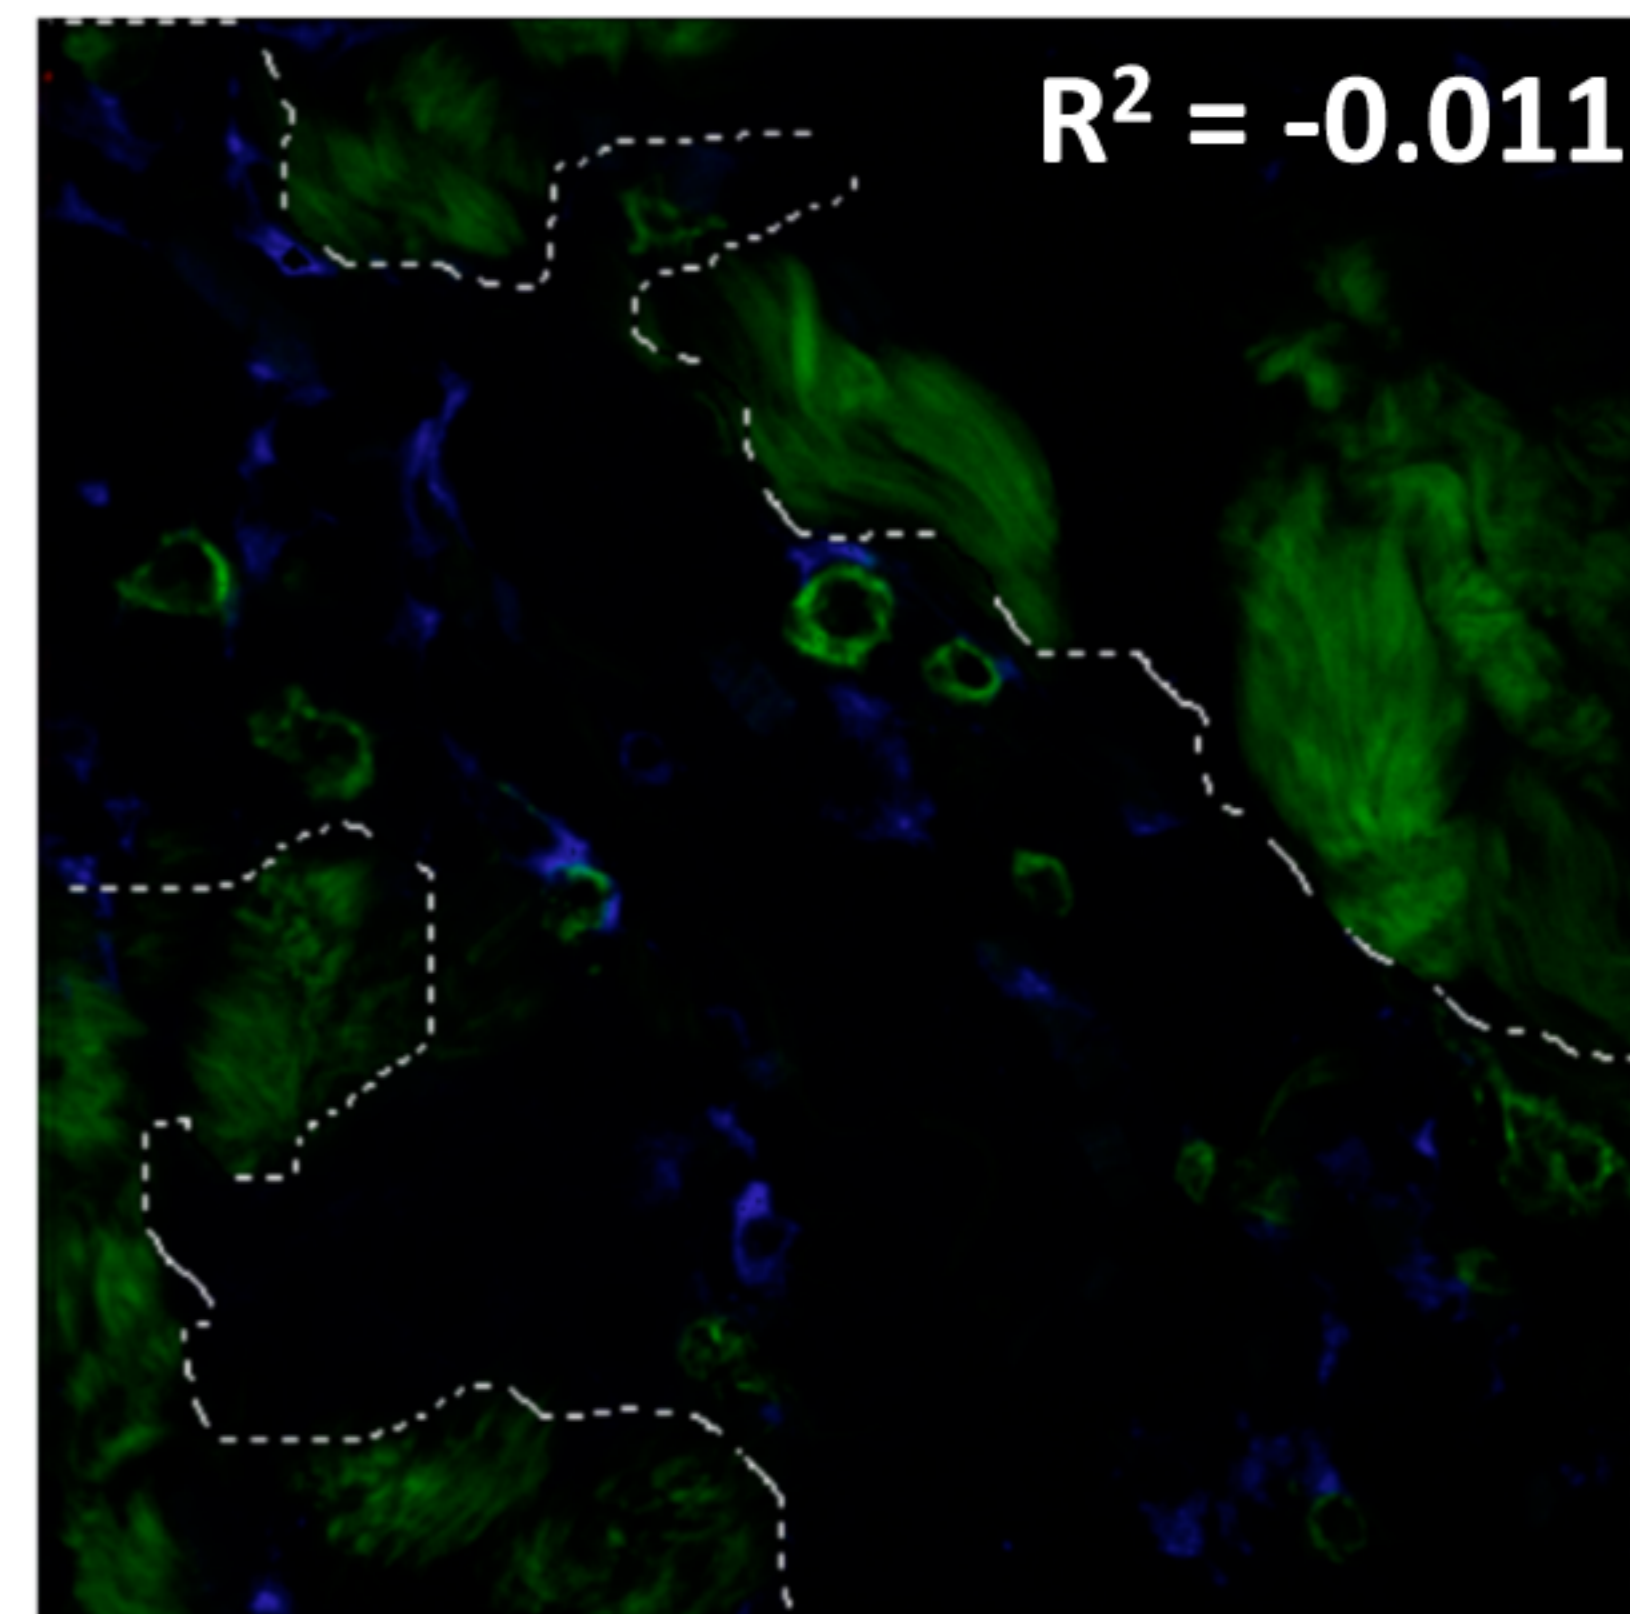**IFNG**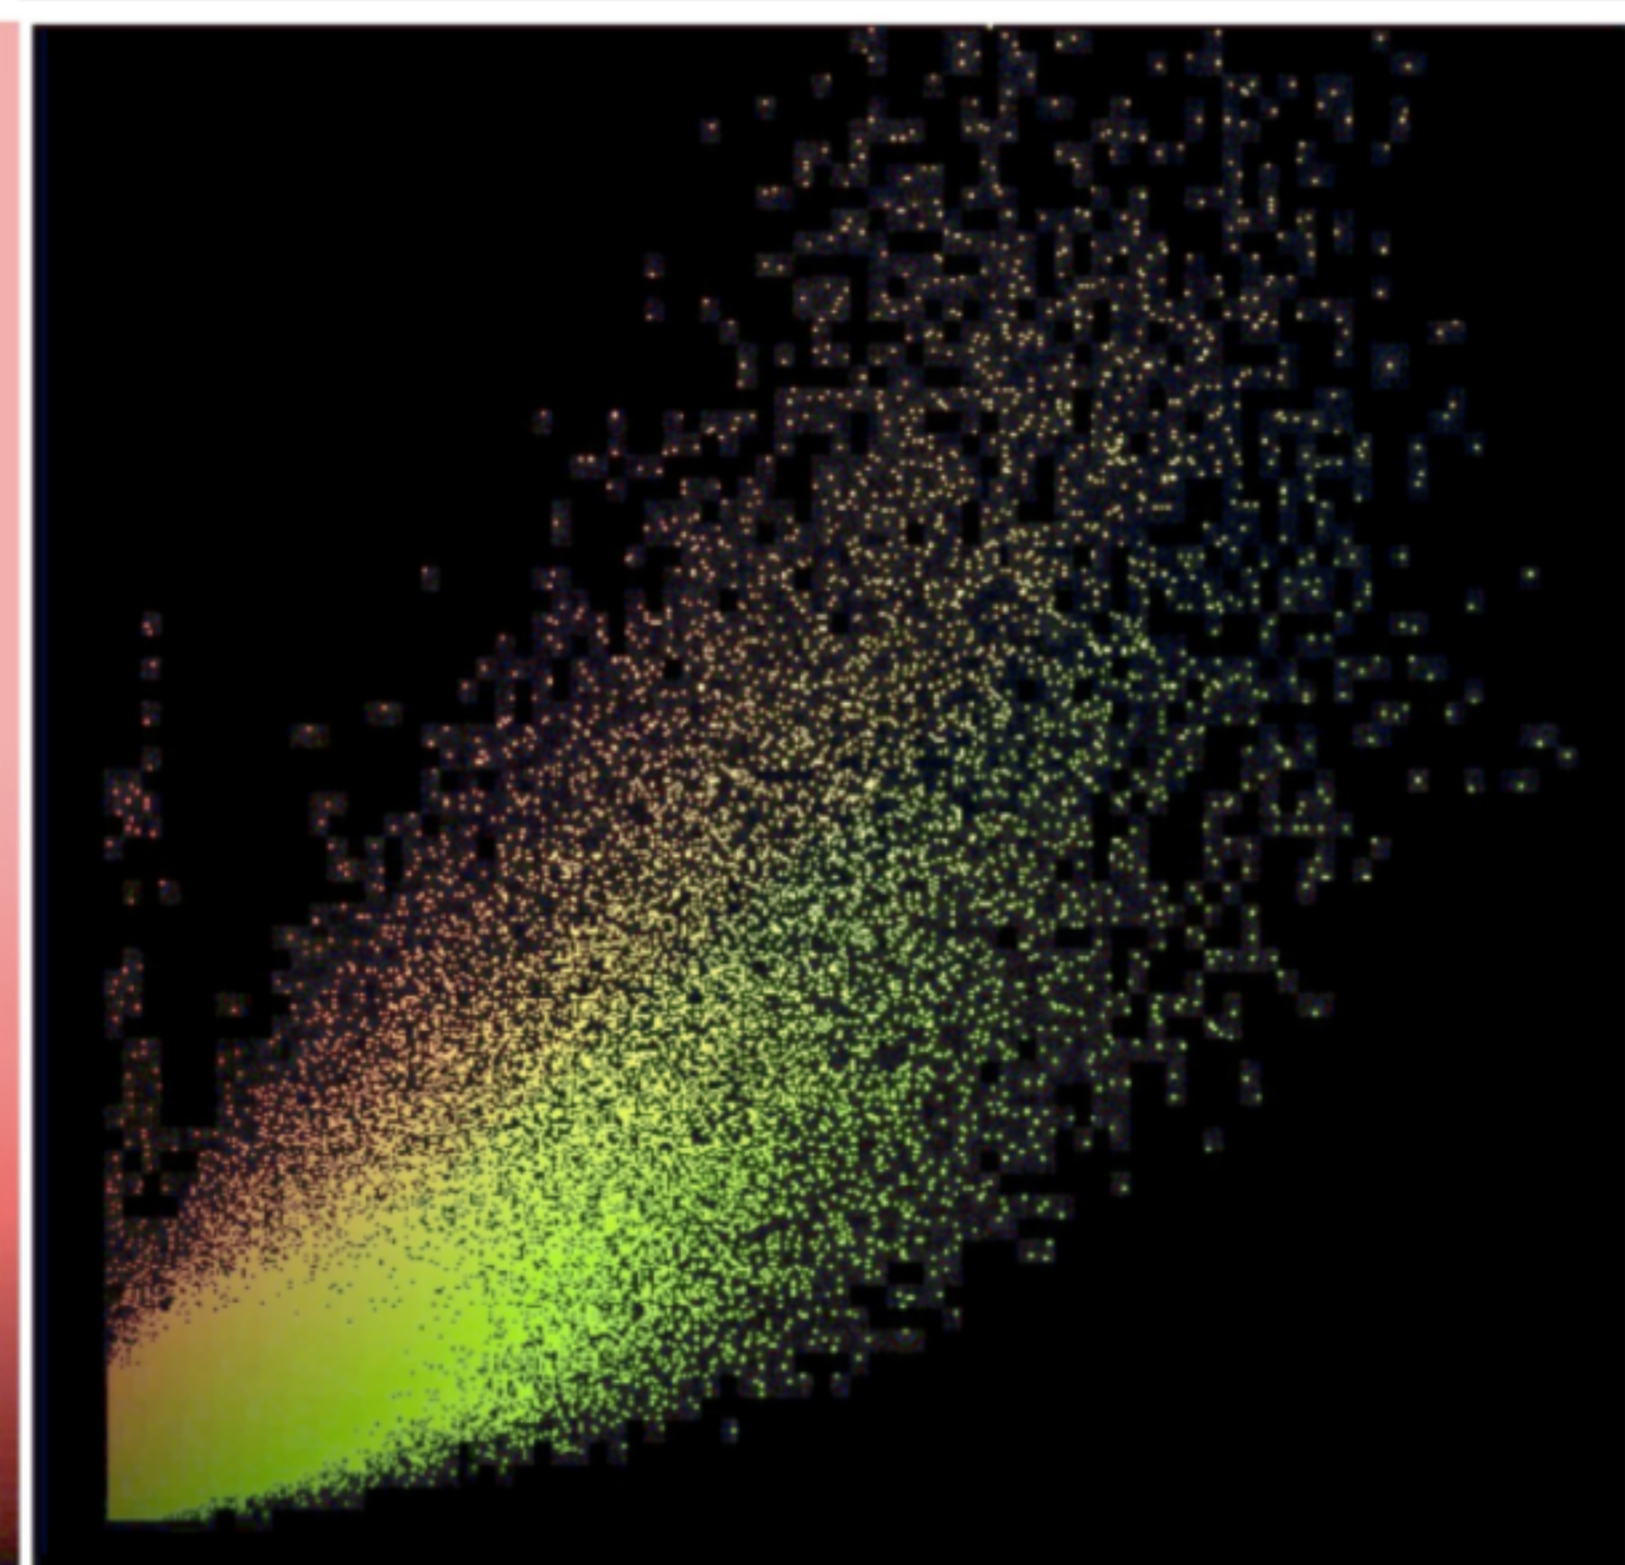**CD3****CD68**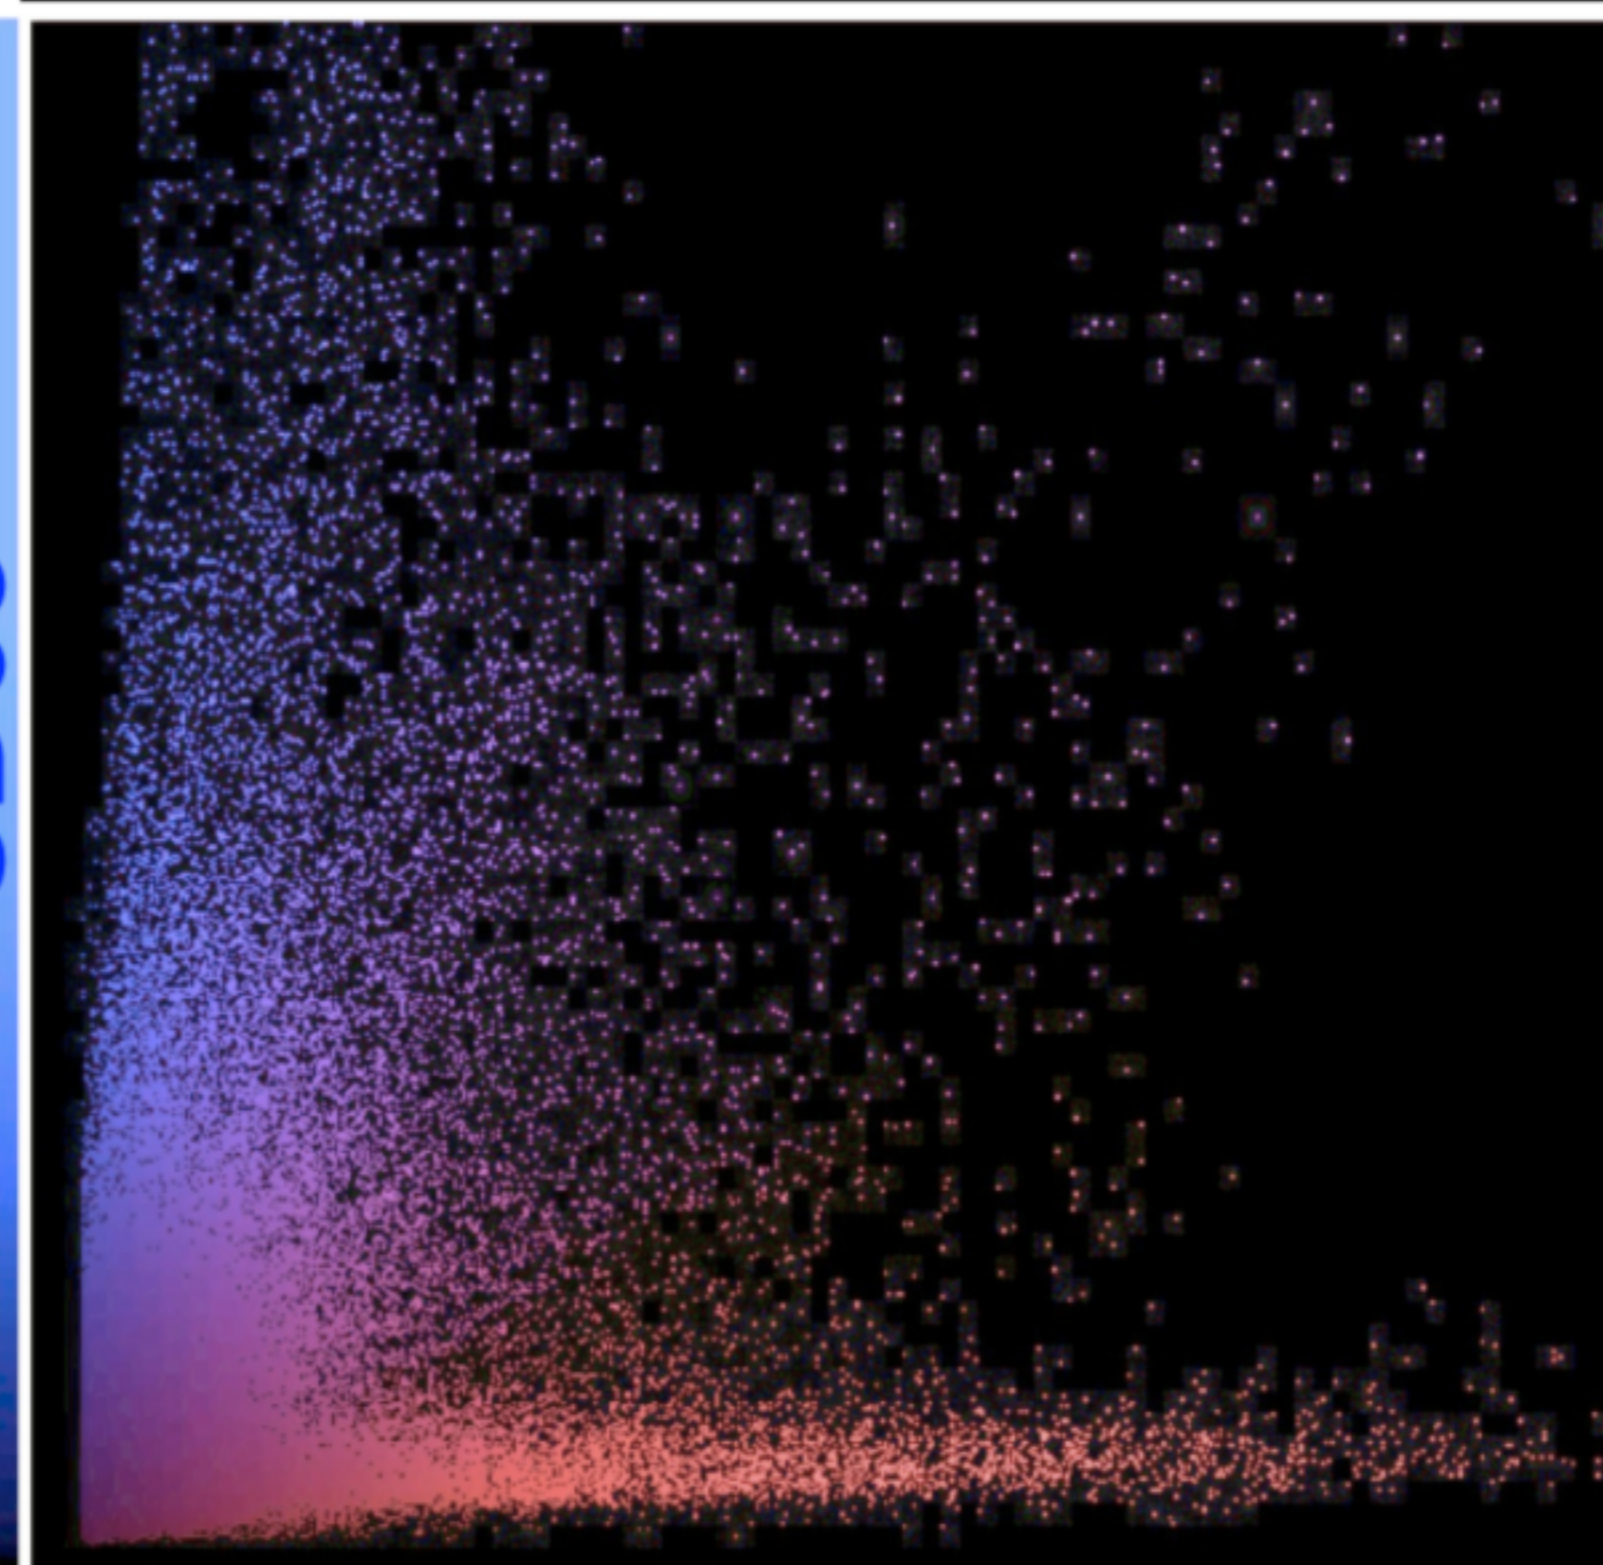**IFNG****CD68**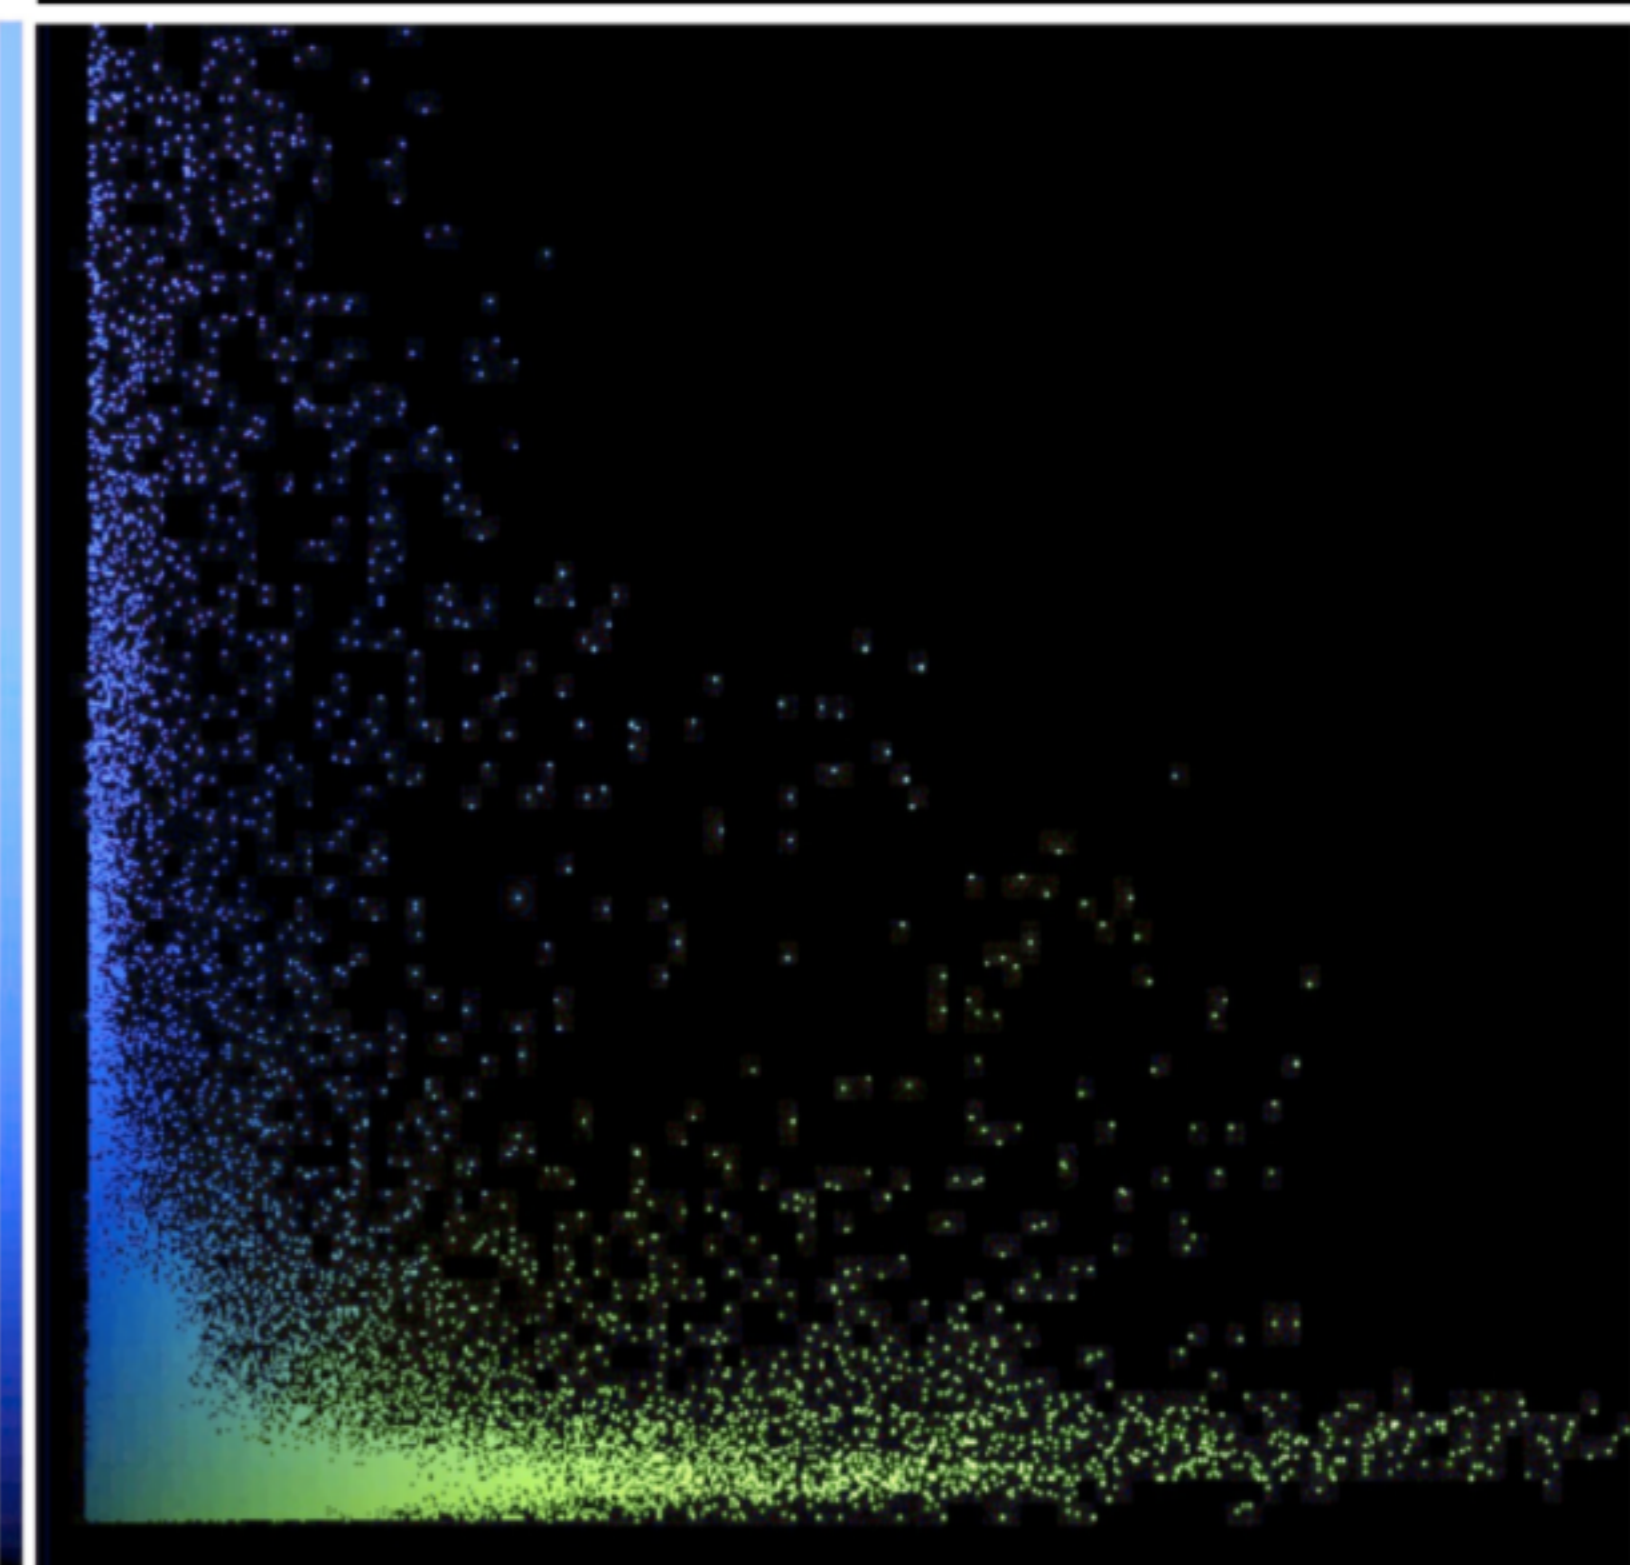**CD3**

Supplement: NIHMS1873545-supplement-Figure_S2.pdf [file NIHMS1873545-supplement-Figure_S2.pdf]

## Colocalization Analysis

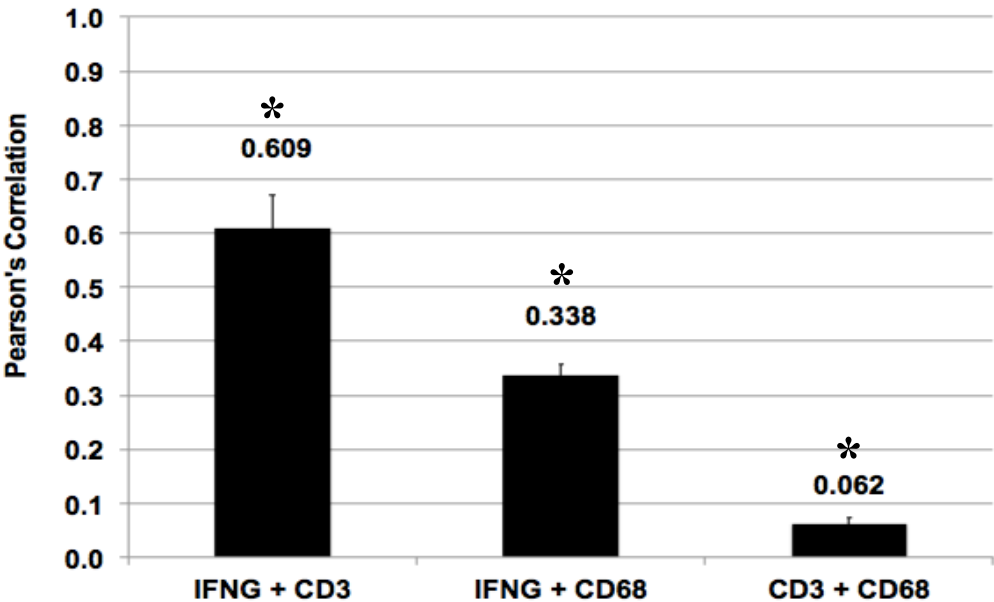

Supplement: NIHMS1873545-supplement-Figure_S3.pdf [file NIHMS1873545-supplement-Figure_S3.pdf]
